# Supplementary figures and images for: Cell migration orchestrates migrasome formation by shaping retraction fibers
Source: PubMed Central journal article supplement — J Cell Biol. 2022 Feb 18;221(4):e202109168. doi: 10.1083/jcb.202109168 (PMC9195050; doi:10.1083/jcb.202109168), 2022-02-18

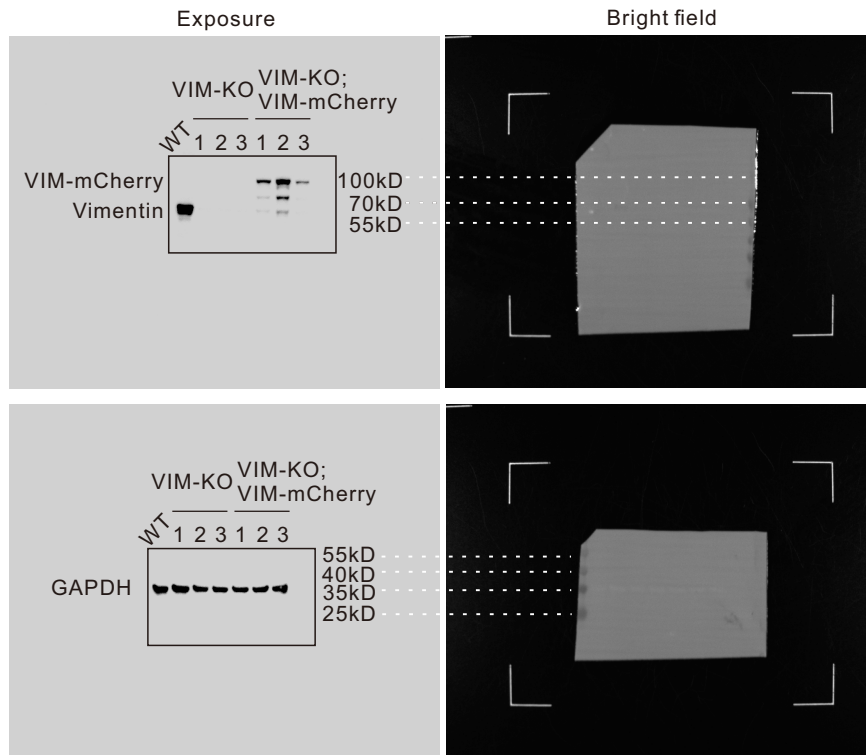

Supplement: JCB_202109168_SourceDataF5.pdf [file JCB_202109168_SourceDataF5.pdf]
